# Supplementary material for: Antidiabetic potential of volavetki sea fish protein hydrolysates in high lipid diet and streptozotocin-induced diabetes rats
Source: Research Square preprint supplement (doi:10.21203/rs.3.rs-7469537/v1), 2025-09-25
Supplement: Supplementary file 1 [file 1f012dedff7fec2cac3054f2.docx]

Supplementary file no.1: Peptide sequencing of FPH

| **Name of peptide** | **Acc. No.** | **Peptide Sequence** | **Molecular weight [kDa]** |
| --- | --- | --- | --- |
| Histone H2B | A0A0F8BJR7 | MPETVKAPKKGSKKAVSKATKTGKKRRRTRKESYAIYVYKVLKQVHPDTGISSKAMGIMNSFVSDIFERIAGEASRLAHYNKRSTITSREIQTAVRLLLPGELAKHAVSEGTKAVTKYTSSK | 13.5 |
| 2-iminobutanoate/2-iminopropanoate deaminase | A0A0F8B6G2 | MATIRRRIPYTPKAPIRQGIYSQAVVVDRTMYISGQLGMDVASGQLVDGGVQAQAKQALINMGEILKAAGCDYTNVVKTTVLLADINDFNSVNEVYKTFFSSNFPARAAYQVAALPRGGLVEIEAIAVLGPLSDS | 14.4 |
| Histone H3 | A0A0F8AE53 | MARTKQTARKSTGGKAPRKQLATKAARKSAPATGGVKKPHRYRPGTVALREIRRYQKSTELLIRKLPFQRLVREIAQDFKTDLRFQSSAVMALQESSEAYLVGLFEDTNLCAIHAKRVTIMPKDIQLARRIRGERA | 15.4 |
| Hemoglobin alpha chain | Q3Y9L5 | MSLSAADKARVKGLWAKIEAKSAELGGEALGRMFVAYPQTKIYFSDWGQDLGPKTQKVQNHGATIMASVGKAVKNIDNLVVALSQLSELHAFKLRVDPANFKILAHNMMLVIAMYFPGDFTPEVHLSVDKFLACLALALSEKYR | 15.8 |
| Alpha1 hemoglobin | Q5RM02 | MSLSAADKTRVKTLWGKIEARSAELGGEALARMFVTYPQTKTYFSDWGQNLGPQNEKVKTHGAVIMAAVGKAVKNIDNLVGATTQLSELHAFKLRVDPANFKILAHNMMLVIAMYFPGEFTPEVHLSVDKFLACLALALSEKYR | 15.9 |
| Hemoglobin subunit beta | A0A0F8AUM4 | MVEWTDAERAAITSLWGKIDVGEIGPQALARLLIVYPWTQRHFGAFGNISTNAAILGNQKVADHGKIVMGGLERAVKNLDNIKEVYKTLSVKHSDIIHVDPDNFRLLAEIITICVGAKFGSAGINPDAQAAWQKFLSAVVSALGRQYH | 16.1 |
| Methylmalonyl-CoA epimerase, mitochondrial | A0A4U5U8X8 | MRAHSTTAPLRQGVPGSLWKLGRLNHIAIAVPDMEKATALYRDVLGATVSDKVPLPEHGVYTVFVELGNTKLELLHPLGEKSPIAGFLQKNKSGGMHHICIEVDDINAAIADLKAKNIRTLSAEPRIGAHGKPVMFLHPKDCDGVLVELEEA | 16.4 |
| O-acetyl-ADP-ribose deacetylase MACROD2 | A0A6G0I2Z7 | MPANKTLLGGGGVDGAIHRAAGPMLQKECASLHGCETGEAKITCGYGLPAKYVIHTVGPIAQKGVGEVEKKALRSCYKNSLEVAAKNGARSVAFPCISTGIYGYPPEQAVHEALATVREYLDEHDDELDRVIFCVFLPADKELYLQNLPLYFPAEATVKSKL | 17.4 |
| Peptidyl-prolyl cis-trans isomerase | A0A6G0IMX4 | MANPRVYFDITAGGAPVGRIVMELYASEVPKTAENFRALCTGEKGFGYKGSIFHRIIPDFMCQGGDFTNHNGTGGKSIYGNKFADENFNLKHTGPGILSMANAGPNTNGSQFFICTSKTTWLDGKHVVFGKVVEGMDVVNKMEEKGSQSGKTSTKIAIADCGQL | 17.6 |
| THAP domain-containing protein 4L40 | A0A4U5UX220 | MACPVNHSVELNAALLPLDWLLGTWESDEPGEGCFPTIKPFRYTETLNFSHVGQPVINFMFNAFHAESKKPLHRECGFIRMQPGTNRVAFIIAQNSGLVEIEEGELTAQQLNLQSQSLARTSFAREPYVQQISRVFQLRPDGRLEQTVSMATDNQTLMQHLHITYRRSS | 19.2 |
| Receptor expression-enhancing protein | A0A4U5VFR5 | MSQFKERFVTLLHEKNFVTDQLATLEQKTGVKREYIALGLLSFLGLYLLFGYGASLLCNVIGFAYPAYFSIKAIESNVKEDDTQWLTYWVVYGLFSIVEAFSDIFLFWFPFYYAGKCLFLIWCMAPVSWNGSEMLYKRVIRPFFLKHEAAMDNMVSDLSSKAKNLTETVTKEAVNRALNHDKDQ | 21.3 |
| Natural killer cell enhancer factor | H9TKY7 | MAAGKAQIGKLAPDFTAKAVMPGGQFSDLKLSDYRGKYVIFFFYPLDFTFVCPTEIIAFSDAAEEFRKIGCEVIAASVDSHFSHFAWTNTPRKQGGLGSMKIPLVSDTRRTISTDYGVLKEDEGIAYRGLFIIDDKGILRQITINDLPVGRSVDETLRLVQAFQHTDKFGEVCPAGWKPGSDTIKPDVQKSKDFFAKH | 22 |
| Myosin light chain 5 | A0A4U5VC09 | MVRSGAARSSDLRQQLFRPPENSTFTKRVAHVRGSLPGRGSCSGPALSPWTVLFIRPSSHVRQLLYLKPETQQTDHGETEQQQDTMASRKTKKKEGGAKRAQRASSNVFSMFEQTQIQEFKEAFTLIDQNRDGFIDKEDLKDTYASLGKLNVKDNELEDMLKEATGTDPEDTILNAFKLFDPDAKGFVHKDELQKVLMTQADKFTAEEVKQMFQSSNIDAAGNLDYKSLCYIITHGEEQEE | 27.2 |
| Serine protease 57 | A0A0F8AZL2 | MAVAFVLLLLFVLNEADSSRIVGGREAAPHSRPYMASLQVRGRQNCGGVLVRQDFVLTAAHCQIPVPYTVVLGADALSGDEPTKQQFSAIRSIPHPNYDGHRNDIMLLKLNSSAQLTDAVQLIPLKRGRVRTSSKCLTAGWGDIGDNRTFPARLQEVNVTSLSQQTCRRRWGNVPITRRMICGVGDDVFQGFCSGDSGGPLVCDGAAAGIVSFSGRRCGNPRTPDVYTRISSFTDWITRVLNSN | 26.5 |
| ES1 protein, mitochondrial | A0A0F8CEV3 | MLAVLQRCARDLRTFRTVRALNQNFCSAHMDKRVAVVLAGCGVYDGTEIHEASAVLVHLSRGGARVNMFAPNIDQMHVMNHVKGEPSEEKRNVLVESARLARGNIQDLSKLSVKEHDAIIFPGGFGAAKNLCTWAVQGKDCSVNDEVKAALQAFHGEGKPIGLCCISPVLAAKVLPGCEVTVGLEKDDKYPNTTDTAAAINQLGCKHVSKSVSESHVDAKNKVVTTCAFMCDAPMHEVFDGIGAMVQDVLKLA | 27.2 |
| Carbonic anhydrase | A0A4U5UYJ4 | MSHGWGYGPTNGPDKWGDDFPVANGPRQSPINIVPKEAQYDSSLKALKLRYDPSNAKGILNNGHSFQVDFDDDTDSSTLTGGPISGTYRLRQFHFHWGASDDRGSEHTVNGIKFPCELHLVHWNTKYPSFGEAASQPDGLAVVGVFLKIGAANPRIQKVLDALDAIKTKGKQTTFANFDAKTLLPPSLDYWTYDGSLTTPPLLESVTWILLKEPISVSPAQMAMFRSLLFTGEGEAPCCMVDNYRPPQPLKGRQVRASFK | 28.6 |
| Homer protein-like protein 2 | A0A6G0J1B7 | MGEQPIYTTRAHVFQIDPTTKKNWVPASKQAVTVSYFYDSTRNSYRIISVDGTKVIINSTITPNMTFTKTSQKFGQWADSRANTVFGLGFSSEQQLAKFAEKFQEVKEAAKLARDKSQEKVETLSNHSQESGRETPSNNQASSINGTDDEKISHVGPEAAVLKSENERLKSAVEQSNTNAKKWETELQTLRENNARLVDALQESSANVESWKKQLSVCKEESDTLREKIAELEAQCKEADQEKQKNAQLSVRVRELETELHDKEQELENLRKQAEIIPQLMAECESITTKLQAAEMKNSDLEGRIGSLQVDIDDSRQKQGNMKGELKKFMDVLDGKIDELHEFRQGLSKLGADN | 39.9 |
| Cytosolic 5'-nucleotidase 1B | A0A4U5UPL2 | MSEIKPNESAPAPAEDNGEEKDWAAAKAFFDNLKTHKPRPPKPRYAVTIAVSSRTLFNMVAERKIYEEEGVEKYVAYQLENENEPLKPGAAFPFVKVRPENRKLTLNHSDTISRLLVSALSHTQALMNVNSRLKELYPDSEELFDIVLMTNNHAQVGVRLINSINHYDLTIERFCMTGGQSPIGYLKAYMTNLYLSKDSEKVGEAIEEGIAAATMFTPTMEMELSDTQLRVAFDGDAVLFSDESEIIVKKHGLDTFFEHEKEFENKPLAQGPLKCFLEALGKLQRKFYAKNERLNCPIRTFLVTARSAASSGARVLKTLRSWGLEIDEALFLAGAPKGPLLQKIKPHIYFDDQMFHIEGAKELGTISAHVPYGIGQKYNRGKLIEPEKKE | 43.9 |
| Keratin, type I cytoskeletal 50 kDa GK50 | A0A6G0HU05 | MAHYSRSTVFSSGNRIGSMRAPSVYGGAGGQGVRISSMSAPRSFSSSAGAGFSAAGSGAGAGFNLADALDVTDNKKMAMQNLNDRLASYLEKVRKLEQANAELELKIRQFLESKTTPQGHDCAAFKVTISDLQDQILLATRTNGSLYLAIDNAKLASDDFRVKFENELAMRQSVEADIAGLKRLLDELTLGRSDLEMQIESLREELIQLKRNHEEDLIALRTQDLSVVMAGIREHYETVANKNRRDLESWFQAKSEELNKEVAVSTETLQTTRSEVTEVKRSLQGLEIELQSQLSMKASLEGTLADTQARYSNMLTGYQRQVTGLENQLAQLRADLERQGQEYQALLDIKTRLEMEIAEYRRLLDGELLTPTSTTTTSTTRKVVIVTKEIVDGEVVSETH | 44.3 |
| Keratin, type II cytoskeletal 8 | A0A0F8AFX8 | MSVQSSGSTRRTFGGPSSYSVKRTTISGVGSGPASGGFSYGMSSMGGGSSFSGGFSSGSQGYIAPPITAVQVNQSLLAPLNLEIDPTIQAVRTQEKDQIKTLNNRFASFIDKVRFLEQQNKMLETKWSLLQDQTTTRSNIDGMFEAYIANLRRQLDGLGNEKVKLEGELRNMQGMVEDFKRKYEDEINKRAAAENEFVLLKKDVDAAYMNKVELEARVDALQDEINFLRAVYEAELRELQGQIKDTSVIVEMDNSRNLDMDSIVAEVRAQYEDIANRSKAEAETWYKQKYEEMQSSAGQYGDDLRTTKAEIAELNRMIARLQNEIEAVKSQRASLEAQIAEAEERGELAVKDAKLRIKDLEDALQRAKQDMARQVREYQELMNVKLALDIEIATYRKLLEGEETRLASGGSNATIHVQQSSGGGLQSSAGFGYGGSSGYSSGSYSSGGYGGGYGGGSTITKSSVQSVRRAY | 51.8 |
| Protein disulfide-isomerase | A0A4U5U504 | MLKFLLICTLAVASRAEITEEEDVLVLKKSNFDEALKAHPNILVEFYAPWCGHCKALAPEYAKAAGMLKAEGSAVRLGKVDATEETELAQEYGVRGYPTIKFFKGGEKESPKEYSAGRQADDIVNWLKKRTGPAVTPLTGVTEAESLIADNEVAVIGFFKDAESAGAKAFEKAAEAVDDIPFAITSDDAVYSKFEVSKDSVVLFKKFDEGRNTFDGELTKEALLAFVKANQLPLVIEFTEQTAPKIFGGDIKSHILMFLPKAASDFQDKMDEFKKAAEGFKGRILFIFIDSDVDDNQRILEFFGLKKEECPAIRLITLEDEMTKYKPESEAITAESITSFCTLFTEGKLKPHLMSQDIPKDWDKNPVKVLVGKNFEEVAFDSSKNVFVEFYAPWCGHCKQLTPIWEKLGEKYKDSADIIVAKMDSTANEIETVKVHSFPTLKFFPAGDERKVIDYNGERTLEGFTKFLESGGKEGGAPAGDDEEELDADDLDDVEEGQDEDSDGEDDDGHDEL | 56.9 |
| Putative aminopeptidase NPEPL1 | A0A0F8CG21 | MANVVLEFKASAGDSEPQTRPVLIIGQQASLQQVSWSGVKGKLQPAVSKEVWQAALGALNPNPTDSCPLYLNHAAVAALPSRVSRHNSPSSAHFLSRLVRSCLPGGNNRCIVMVCERSDVFASGCAIARAFPIFSRRSATSRRAEKKHVTVEFVIVGQDSNPLDVGELECLSNAADGVRLAARIVDTPCNEMNTDHFLDEIKAVGTELGITPVIIRGEELKQKGFGGIYGVGKAAEHPPALAVLSHTPDGATQTIAWVGKGIVYDTGGLSIKGKTTMPGMKRDCGGAAAILGAFKATVKQGFKDNLHAVFCLAENSVGPTATRPDDIHTLYSGKTVEINNTDAEGRLVLADGVVYASKDLSADIILDMATLTGAQGISTGKYHAAVMTNSEQWEVACVRAGRSSGDLAHPLVYCPELHFSEFTSAMADMKNSVADRENAQSSCAGLFIGSHLGFDWPGVWVHVDIASPVHAGERATGFGVALLMALFGQASDDSMLNKVSPLGAPTNMSDGDQMERDCKRRRLV | 55.5 |
| Transmembrane protease serine 9 | A0A0F8B0H1 | MKRSRIVVLTFLCVVSSDLKLNQLNVTLNETLQEHEMFSERFGYSDLSGVRSFVPEQEMESRIIGGQEAWAHSWPWQVSLRFASMPACGGAIIGPLWVISAAHCFKRYNKASFWTVLAGKHDLDNPEEPTQQVVGVLVIINHHGYNTRTKDNDVALLKLQHPLIFNQFIRPINIWMTPLPPFRRCTITGWGSTRENGPRIHRLQEVNVTILPFDVCNQYYLGRIRPSMFCAGKDGGGADACQGDSGGPLSCFTGSRYELAGVVSWGIGCGRARKPGVYTKVQQHTEWMSTVISDQSIMSADDVTPEEDRCGKHQSSSCRTSPGLAALSVSQDGEASVRNVTESCPFFWPWQVSLQSGRRHYCSGALIHHRWVLTAKHCNVRPKEDVVVLGVHDLRFTSSQTVPVDKVFNPPHDGSFPPKSDLSLLRLSVPTRFSSNVSPVCVPDEDHDLDDSWSCVTTGWGATKATADIDPDRLHHAGLTLLNQTTCMEKWGGGLISDTHICSHPAGSASCMGDSGAPLLCRKGGAYFLFGVLTWGSRRCDVDKPAIFTRISDYHSWISEVTEDV | 62.5 |
| Drebrin Developmentally-regulated brain protein | A0A6G0I8H9 | MAVNLGKNRLALLTAYQDVIDETSDTDWALYTYEDDSNDLTLASSGEGGLAEITLTFDSGRVMYGFCSLKEPTSALPRYILINWVGEDVPDARKCACASHVATIADFFQGVEVIVNASSLDDIDPSAIGQRLTNGTAVVASPVLSRLRTRDEEHGDVGTVYEKTNAEVEMKKINREEFWEQAKREEEIRKEEEKKKAAEERQRYEEERMELERKEQENREKRYRERERQIEEHRKKLQEEEEARERLQNQTGIATEASLEDLNLDKKESEVEEAKAIIAQRSGNPREFFKQKERAMTISVDTSPVSVHRTDDNDDEGRTERNMAAVSPIPKIVTTPIKEDFSKDEEDCRDEWDSVPKEEQKPPVQESTPTKPVQSVAPQARDSSNFSVWESGTDSLVNLWDSSSGPPPNSSQTSQSSNLVDLMGDVLHDNLPPSTAAASSKPQPLLSFDEMMDGTFCSGTGAEDDPSSLVDVTASDQMTLSYQHALQHASGERQELDDGQLLMTNGETLLKEGTQASEGYFSQSQEEEFGQSEESSAKPTPVFYNKPPEIDITCWDTDPVVDDEDD | 63.4 |
| A-kinase anchor protein 8-like | A0A4U5U384 | MDSRGYGSGYSSWGGGGSGSRGSGGFDLYGGGYKDSMSGLGGYGGGGSGGGGGGGGGGGHHMKRGLSGASLLSSTGTHADAVIAKINQRLDMLTQLEGGLKGSRGDRYDQYESFDSRTSGLTSSRDLYRSGGSSYGYGDGRGDNMLLGQRGGSGFGGGIGLGGGGGFDSPSSSYGVAKMRQNMRESFSSGQGGGSGGGGWAGAGRRSPRRGGSAGGRGAGGGFGSRRSDPTPLGGGGQGSGSGGQSHRGHSPGGGRGKLPSLLSNRMYPESGGFHQGSIQGPHDFPGRHFGGGPRAGRQRGRKRPLNKQVKPQRDVQKKRKQTLTAADEPESKMNKTEGAGSEATQEQAEKNGDDSESKTEAAETKPAADGDKASPKPKEKKSPQGKQTPSQGQDKHPKMRKRRGFLERVMFACSVCKFRSFYKEEMETHLESRFHKDHFKFLSGQLSKPTTDFLQEYLQNKFKKTEQRVDQLENHSATICQVYKEQDLTRDLGMEHFMRKVEAAHCAACDLFIPMQPHLIQKHIKSPDHNYNRKGMMEQSKRASLSVARSILNHKLIGKKLESYLKGENPFSGNQDDQDPEDSMMMDVSELEMTSEDSRRPDGHNNSQGRGGG | 65.2 |
| Junction plakoglobin | A0A4U5VUQ2 | MMSMQMSEADSVVKVAEWQQTYYASDSGIQSGATTVRDDESSTEYSGRKKYSSSTMTSTTTAPTAATGGGGGEDLDAQYSLTRAQRVRAAMFPETLVEGEAAMPVQSDPTQQSNVQRLAEPSQLLKTAIVHLINYQDDAELATRAVPELTKLLADEDPVVVNKAAMIVNQLTRKEASRRVLVQSPAMVGAVVRAMTTAVDMETARCAASVLHSLSHQREGLMAIFKSGGIPALVRMLRQQLREYFPVTPKENNWMRNPFNIETLDMPTNFTVGGQESSPVESVLFYAITTLHNLLLHQEGAKMAVRLADGLQRMVPLLKKSNPKFLAITTDCLQLLSYGNQESKLIILANGGPEGLVFITRNYNYEKLLWTTSRVLKVLSVCPSNKPAIVEAGGMQALGQHLTGSSQRLIQNCLWTLRNLSDAATKQEGLDGLLQILVTQLGSDDVNMLTCATGILSNLTCNNSRNKTLVTQYGGVEALIHAVLRAGEKEDVAEPAVCALRHLTSRHQDAELAQNAVRLHYGIPAVVKLLGQPHYWPVVKATVGLIRNLALCPANQAPLREAGAIPRLVNLLLKAHQDTQRHASSAQQTYQDGVRMEEIVEGCTGALHILARDPINRGEIASMQTIPLFVQLLYSYVENVKRVSAGVLCELALDKQSAELIDAEGASAPLMELLHSNNEGIATYAAAVLFRISEDKSSDYRKRVSVELTHSLFKHDPAAWEMAHTAVPLEPTYLADELDGSYQPYGYADLPLDTMPLDPDLHEPYIPDMTYDPRQAYPEPL | 85.5 |
| Aconitate hydratase, mitochondrial | A0A4U5VNG8 | MATYCLTVARLQLALGHGARRLHVSAAYRAKAQVSMSRFEPTSFINYEKLQSNVDIVRKRLNRPLTLSEKIVYGHLDDPHNQDIDRGRTYLRLHPDRVAMQDATAQMAMLQFISSGLPRVAVPSTIHCDHLIEAQTGGPKDLARAKEINEEVYNFLSSAGAKYGVGFWKPGSGIIHQIILENYAYPGVMLIGTDSHTPNGGGLGAICIGVGGADAVDVMAGIPWELKCPKVIGVKLTGTLSGWTSPKDVILKVAGILTVKGGTGAIVEYHGPGVDSISCTGMATICNMGAEIGATTSVFPYNHRMRTYLEKTGRGQIAALADKYSDLLVPDEGCEYDQIIELNLDELKPHINGPFTPDLAHPVSDVGAVAEKNGWPLEVKVGLIGSCTNSSYEDMGRAASVAKQALDRGMKCKAQFTVTPGSEQIRATIERDGYSKILGDVGGVVLANACGPCIGQWDRRDVKKGDKNTIVTSFNRNFTARNDANPATHAFVTSPEIVTALAIAGTLSFNPETDYLTAPNGEKFKLEPPTGDELPAKDFDPGQDTYQHPPADGQVLKVNVSPESNRLQLLEPFDKWSGSDLEDLNVLIKVKGKCTTDHISAAGPWLKFRGHLDNISNNMLIGAVNSENDAINKIKNHLTGEYGGVPDVARHYKANGVHWVVVGDDNYGEGSSREHAALEPRHLGGRAIIVKSFARIHETNLKKQGLLPLTFSNPSDYDKIRPDDKLSIKGLKTFAPGKPLSAVVKHSDGSEETLELLHSFNETQIEWFKAGSALNRMKELQQ | 84.7 |
| Glycogen debranching enzyme | A0A4U5UZI7 | MASTSQMLPQHLKQIRVLMLNDKENLERTLFRLEQGFELQFRLGPSLQGRRVMVHTNYPLEGQPFDRNNFRVLAWNYPTGREDDSDKFCCLDLQIAGSYQYYFGYGDIECSGRGYIVVDPVLRVGGDNHVLPLDCITIQTYLSKCYNMIHFTPLQTLGESRSCYSLADQLTFNPEFSPEGESYNWEDVGALVEKVRTEWNMLCITDVVYNHTAANSVWIKEHPECGYNLVNSPHLRPAWVLDRAILHLTTRVAEGRYKSKGLPADITNESHLNALRRVLWEDVYPEIKLWEFFQIKVDSSVEQFRTLLQKGTEPDRSKTGGKKGLKIIQDPHYCRYGNTVDMDSALETFVPHSSSPQHIEDCCGWLRQKLNELNEEQHHIIHQHQEQASAANCIVGNIVYERLADHGPKLGPVNRKNPLVTRYFTFPYQDMTLEQELQLLDQPDKTCNFLAYNGWVMGDDPLRNFAEPGSNVYLRRELICWGDSVKLRYGKEPEDCPYLWAHMRKYTEITAKYFHGVRLDNCHSTPLHVAEFMLDVARTLCPNLYVVAELFTGSEEMDNIFATKLGITSLIREAMSAGDSHEEGRLVYRYGGEPVGAFVQPSLRPLMPSIAHAMFLDVTHDNECPIQSGIVAGKLALNKLHQELAAQGFIQVYVDQVDADIVAVTRHCPSTHQSVVSVCRTAFWNPKTHQYGTNVPPMFIPGKIEEVILEARTVERNAGSYTRDDKYINGMLEYTVEIKEHIPLQESTLVKQAGVTSKGRSEFVQEITFQKLTPGSVIAFRVSLDPKAQRLVGVLRYYLSQFSPKYRRGSVAEENSPDALQNPLAQLMSTLTLADLNVLLFRCNSEEQEDGGGCYSIPGWETLKYAGLQGLMSVLADIRPNNDLGHPLCANLRQGDWLIDYVSNRLINREGPLAQVGQWLAAMFTYLKHIPRYLIPCYFDAILVSTYTTALDATLKLMSSFIQNGSSFVRHLALGSVQMCGVGRFPALPPLSTNIEGVPYRLSPITGQKEQCCVSLAAGSLATNEQPLYEVIQEALQRHLEGISFSERNAGSKIDMNMRDEGFNVLAKVDPATGFVSGGNRFNCGTWMDKMGESERARNKGMPATPRALLCVPGKEVFISYSQWNQQLHHSFEAAFWVSGIPNDPNEKHPDLVHKTGIYKDSYGASSSWCDYQLRPNFTIAMVVAPELFTAERAWKALEVAENKLLGPLGMKTLDPDDMVYCGVYDNALDNDNYNLAKGFNYHQGPVSVTQLVSEQTKTALWMSPWKGLPELTNENGQYCPFSCETQAWSLATVLEVLYDL | 146.8 |
| Uncharacterized protein | A0A0F8AHS0 | MGKPLSRPGCFRKSSCCLEKHGAGDGGVGGRAGGMEGGYGDGYVPQRSIYDTMCINQQIDSHHHHPGGSVRRDCGGEGSFSYSASGSLRVSRSPADMFDPQPRSLTPNPSFVRRLDERAIYDSLKLGGQDADGGGCHSPGRFNRSVSPSVSSFSAPGVSSSKKHHHHHQHHHGDSTKSRDGRHSWKVLTPPQHLECLELTTTEIMDRGGGYLNPGHYAPPGGQSSSLTSPLISPFSGSPLSSGYHTPVFFSPAKPRPSQTQSLRCSPPQVIQPRHYSQTQSLRLSPPQELRRSPYRAPLVQLSAHDLEQDLRERGGGWGRSEREREWEREREREMERGWAQREWERERERGRLERERARERERRETSTFGTFGYGRPVPLRSDRDSVFLEPDLDTTPLLLPQPSPSPSPSAAPRMGTGAVGRNRAGSKVGPENVGGGMVSKFDNGSVGLVLVDSKSGCGPRLVCEIGTGNMSEAEIRAGIQEHHRTESWNKYDNGSRASVKNGCEPRRGSQVKTRPGGRDLEGKVQSGMEIENMAPAVNKEGHRGGSRSGEKAGRAVAKHERIAEATPSTVTDTENRMVPGGKPEIGTGSSLGMKPEIEAEVEAKASPRQVENRTVTEAGGVVRVNNEVRSVAEPRVETRVETEVKISPTSEPEAVLESGVRNETETKLDTVFGDVSESQNSNKTTDEAQISILDGTKTDTPFAEEAEKKTVDADKIESSHVEKVSRSQKSKSSKSSSRTRPGTATGIRPGVASPRLSKGLGDLESTGPTEGIESTWPRRLIVRKRTVRQGGALHNLPILPPLPSVLSALEKRRPLGLLHHRPGHFSENPLTNLINATSIVGRCSLKEPSHPEPGASLVVRASLKEQNLEHWRVCREQEEPRRSRSREKQGEQIKEKTEGEERMGEEEKREKEWREEKDKREEKVCKEKERITGSEGAVEETKREKSERRVEGKVQEDRNKKEDMKKEIAVQIKCEQVEVKEMKIRDGIQEQHGQELEEVVAKLKPEEGEVEGGEGDTFGEEGGMESWDAVLEMVTTLWDDGWEKGGAGGGGDTDSFSGSLQRWPLLRPPIGFGGSHPPSSAASELSLTELERRARELDSDLEHLDLSQPHRDTQDLYQTLLEPQRERADMYQTHPGPQREKAALLTGVGSRSQVSLELSSMASPATDTDRSPVDWSAKSAGTSTVGPSSTKEDSSPDSNLTLESDSSGIFLSLSNQSQEEAGSDSDQPISGSDLGSSSTSLEKDGDDGGLKEWGREESTELQWCYPSLLNTSQHEDVEGDGEREEAGSRDPGEHEETEKDENGRRVGKMVSIKTPLDDTDIEDTPKSEDIPPRKKVTLMGSDSPLPLSPSKQPIKHFLDPNQKPIRSSGLDCGDLDPFVQSDSFVYLAVSARPASRGEVTTVTEFPTHDTKQDSVQQHSDGIKTHLDQSNPERDAKPTHLVPQKPEEGDFLCTDSFVYLAAPACLLLGPAGTTHYSGRDSDSESSGSGPVDLSVLGCGSVAGDSDWDSDLSDSDPSRSSRISAASNKSAGIARPKRLPAEMGWDLFGETTEPEVLSELFREQDKNNNGKARKVTGVTTSMAVTQAIPMATQPVTTPVRQTSTVEQSSTTKKVTWQFKPAQRSVCTGSRKEREKEVTSSSSVRFTELGGGETHRPSPSSSSSSSSSPSSSSSG | 182.3 |
| Nidogen-2 | A0A6G0HHY0 | MQRGEMLAACLLCWSCSVCVVTAIRRADMFPYGTLSGDLILAEGDDETSRVLSLPKPLYFYASHFTQLYVATNGIISAQDLPMEKQYVDDGFPTDFPVVAPFLADIDTSGGRGQIYYRVTETPSVLNRVAQEVHRGFPDAKFTPTYAVVATWEHVAPYEEQSRTTGPSNKVNTFQAVIGYDETDSYVLFLYPEGGLNFFGTRPKESYNVEIELPARVGFSRGEVPYLIFSRTEGPHYSVTSDEQSVKNLYQVGNTGIPGVWLFHTGNRYSFNNIVPASIGGLLATLPPGALSLDTTTPEYTEFEEYTDNSFDPDNQEEEDDYPLTGGDPEFQPAPAGGDHLGTPPPASPNAPSSPSEESGPQVSYGSKHDGQIARFITDPVYSQDVPPAGPKGQQPEVPLEVVDIYPPYNNEPNLSPGGHVISVDEGDVDDIETGVIQYTTENKETCARFQQQCSQNAICSDYATGYCCHCQSGFYGNGRHCLPEGAPQRVSGKMSGTVTVGSTPVELNNIDLHAYVVVGDGRAYTAISEVPEPVGWALMPLAPIGELFGWLFALELPNSQAGFKITGAEFTRRAEVIFYPGNQRLSITQTGRGLDDHNHLTVDTVVSGSVPFLPPGAEVTMDPFKETYQYYPSVATSTSVREYSVVSAERGSESFSFQLKQNITYRDCRHDNRATTLETLQITMERVFVMYVKEERILRYAITNKISPVGAEITRPELVNPCYAGTHDCDTTAQCIPQEGQAFQCQCATGYRGDGRNCYDIDECTESLISCGAHAQCVNLPGSHRCQCQSGYELGFDGRTCVDIDECSSSPCHISARCINGLGSFQCQCQPGFYGDGFYCSQQGAQTVRPKSQCEQHRDSLQSGEGGRPSVGAFIPQCDSDGRYRTLQCHGSTGHCWCVDSRGQERAGTRTPPGTAPRDCDRPDEPERPKTHCEHHRESVQTTSPEGYPIAGVFVPQCDDNGQYIPLQCHGSTGYCWCVQNNGQEIAGTRTVPGETPTNCDNPVEPERPKTHCEHHRDSVQTTSPEGYPIVGAYVPQCDANGQYRPLQCHGSSGHCWCVDSTGQERAGTRTPPGTPTVDCDRPDEPESVLKLNVNTTETAHRLLVQKDILYLESMYPNVMLMDSTVPCSIGQEREGTRTSPGAPPTDCDKPDEPERPKTHCEQHRDSVQTTSPEGYPIVGAYVPQCDDNGQYRPQQCHGSSGHCWCVDSTGQERSGTRTPPGTPSVDCDRPDEPARPKTHCEQHRDSVQTTSPEGYPLLGAFVPQCDDNGQYTSQQCYSSTGQCWCVDARGEERDGTRTGPGTPPVDCDRPVEPERPKTHCEQHRDSVQTTSPEGYPIVGAYVPQCDDNGQYRPQQCHGSSGHCWCVDSTGQERAGTRTPPGTPSVDCDRPDEPARPKTHCEQHRDSVQTTSPEGYPLLGAFVPQCDDNGQYTSQQCYSSTGQCWCVDARGEERDGTRTGPGTPPVDCDRPVPVAPTQRPESVCERWKASLIEHYGGKPESQQYVPQCDPDGEFSPVQCYGETTYCWCVDQDGREVPGTRSHSAVKPACLPSVAPPTVRPLPRPSVTPPTNTDITLLYAQGQKIGALPLKGTKLDASESKTLLTLHGSIVVGIAYDCKENRVYWTDLSARTINRASMEPGAEPEILINTNLVSPEGLAVDVKRRRMFWVDSNPDMIETANLDGSGRRTLFDTDLVNPRAIIVVSSTGTLYWTDWNREARRSRAQRWTVRTAKWWCQTGSVCQTLSPMTRLQDKSAGLMQVRSVWSVSPRMVQVAK | 194.9 |
| Ryanodine receptor 3 | A0A0F8AZ59 | MAEGGEGEDEIQFLRTDDEVVLQCVACIQKENRKFCLAAEGLGNRLCYLEPTSEAKAAQSGGHKTLLYGHAILLRHSFSSMYLACLKTSRSQTDKLSFDVGLQEDSTGEACWWTIHPASKQRSEGEKVRIGDDLILVSLSSERYLHLSISNGNIQVDASFMQTLWNVHPICSGSNIEEGYLLGGHVMRLFHGHDEVVAIPGSDQSEEQQRIVNYETGKAGAKARSLWRLEPLRISWSGSHIRWGQPFRLRHLTTGHYLALTEDRGLVLQDRERSDTIATAFCFRASKEKLEQSPKRDIEGMGVAEIKYGDSLCFIMHVATGLWLSYQAPDVKSARLGPLKRRACLHSEGHMDDGLTLQRCQHEESRAARIIRNTTLLFNRFIRDLDCLGVKNRALVSLPVEEVLQTLNDLIAYFQLPDVELEHEERQIKLRSLKNRQNLFKQEGMLTLVSNCIDRLNVYNSAAHFGECAGSEAGAAWKDILNLLYELLAALIRGNRNNCTQFSNNLDWLVSKLERLESSSGILEVLHCILIESPEALNIIQRGHIKSIISLLYKHGRNHKILDVLCSLCVCNGVAVRTNQNLICDHLLPKRDLLLQTQLVNDVQSMRPNIFLGVSEGSAQYKKWYYELMIDQVDHFVTSEPSHLRVGWANSKGYAPYPGGGEGWGGNGVGDDLYSFGFDGLHLWSGRIPRAVASMNQHILTSEDVVSCCLDLGAPSISFRINGQPVQGMFENFNTDGLFFPVVSFSAGVKVRFLLGGRHGDFKFLPPSSYAPCYEALLPKEKMKVEQVKEYKRDVDGVRDLLGTAHFLSQASFIPTPVETSQIVMPPHLEKVRDKLAENIHELWGMNKIELGWSYGKIRDDNKRQHPCLVDFSKLPETEKNYNLQMSTETLKTLLALGCRVVQVNPNAESSLKKIKLPKNYMMSNSYKPSPLDLSDIKLTPGQELLVDKLAENAHNVWAKDRIKQGWTYGIQQDLKSKRNPRLVPYVLLDERTKKSNRDSLREAIRTLIGYGYNIEPSDQEGGQVVERLSIDKVRFFRVERTYAVKTGKWYFEFEAVTGGDMRVGWARPGCKPDVELGTDELAFVFDGYRGHCLNMGSRLFGRCWHAGDVVGCMINMEDKSMIFTLNGEILITTKGSELCFTDFETEDGFIPVCSLGLSQVGRMNLGKDASTFKYYTMCGLQEGFEPFAVNMNREVTMWFSKRLPTFINVPKDHNHIAVTRIDGTIDSPPCLKVTHKTFGTQNSNADMVFCRLSMPVEFHSIFKSSPVVDMNGVHEEDTLKVKHRYPLRSVRHSDESRRVDYSSITTYYHSVRVFAGQDPAGVWVGWVTPDYHYYSNNFNLSKNRTVTVTLGDERGRVHESVRRSNCYMVWGGDVTNAAHASSRSNVDLEIGCVEPNTKLFPAVFVRPTSPNLFQFELAKIKNAMPLSSAIFKSEHKNPVPQCPPRLDVQTISAVLWSRMPNTFLKVETARVNERHGWVVQCVEPLQMLAVHIPEENRCVDIMELSEQKDMRKFHYHTLKLYCALCALGNTRVAHALCSHLDQSQLLYTIDNQYLSGMLREGFYNVLISTHLETAKEARLMMKDEFIIPVTAETRSIRLFSDASKKHLPPGVGLSTSLKPRLNFAPPCFISTKREQHLYSPQIPLDALKEKSISMLTEAVQGGGHHIRDPVGGGVEYQFVPILKLISTLLTMGVLGSEDVHQILLLIDPNVFRETREDGATGATDKEGLTGTEEKAVEAGEEEAAKEAKQPLKGLLEKRLPEPVKRQMCELLHYFCDCELKHRIEAIVSFSDNFVSKLQFNQKFRYNELMLALNMSAAVTAKKTKEFRSPPQEQINMLLTFSMGEDCPCPTDIQEELYDFHNQLQLHCEKSQFSASNIALTT | 212.3 |
| Treslin TopBP1-interacting checkpoint and replication regulator | A0A4U5UGV6 | MALTLHNLFFVIDVDYGDQDSGDQLDVRNHFVKRGILQILLHFGCKYGFDKVRWGYKFFQSKSARNARLISRGSDFRELRHKTFEDFEVEFEAKFDVKDNLCPSHQKKQSDRSASVQTALKETLLDFQWDRPDITSPTKLSLRPRRSSRAGPQTVSQEDDILNNGRNVVFVVSDCPRSRTQLVNYVCLGNHDLPADVTEHVLSRSLHDMLLQRQVVLHWIDSRSHVQVMRCEDDLGFDKLSEVLAQVGGRVIPVVALLNLCCAQEVFAFKSSIGYLLSSKRLYRLAFPVMDGVLRWEQGDMTQSCGVMVEPVSRSQRLLPESVEVCLKGVLQSWDASSLTQTPIDSWVLQCSRSGDQGAAALEHLLAELSAHDLHMLSEVNDSGLVCSAVLSPLSHCTALLTILQSGITQQDQFMTPEIIAPATAESSAELPDVVSSVLGVVYEIMEKDGDTVDDQPKDHQVPEWAQQEIGKCPLTTGMLENWFPQSDQSGVSSHLMESMRLLHAAPEQKEEEELSVLQQELISDLAELYQTSQGADDKRGKKRGAQRTPVKKKMKTMSRSLQMLNVARLNVKAQKNQNEAEQLGVECKGVDRQGKRRSNDRNKSEAGTTISFTSEAELLSHLNSSYEKTVAERDSSLLTGVQQLLSAVKTFLMAQSDLQVKISLFVQQHLLKTSKSIRQLYGTTADVDSKIRECQLQALLRLELCRLFSTEQPDSLDVDQMAEEVAEMLRIISLTKDPVCLARFLQDDVLPGFLTTVPRVLADIYHNLGTQLPEALVAVLPADFFSDESVAKDSVSPSASSPPLSTQSLGLDGKDRLQDLRNRSANKRRSGMLTRHRSMTESSQNLRQIEMPKKTTRAAKSKVCVAVQKPVPEVQPQKQETQEVTKVRRNLFNQELVSPSKKAKLPRSQSVSAVEGLKRKRSNESDERHKLLTKKVCETPAHKQVSSRFLYRQKMGRRSVPAEECIVEESPVKPAEDLRRSPRIKKFARRHSNTFYSSSQARSRNLDRALSASQFTLSDGKISEVNVKAVRSPMRLLFGATKSPSRLSDQSYATRATRSRLSTDSSVFESPNKTPTKSPSRRGRAMHGITTPKTPRTPRTPGSPKTPPPSRRHVFSVAESPVAGSSRKLQMALRGSPLRSPARRILVVETPTKQSPVRSPLKGILRTPVKALVECSSSSGLHLLNSSISRTPKKSVTWSPSPRKCRLTENIAFKVPESPRIASRASPRLVKTPNTFCSPVKSKNTKRDIFKTPEKTCQVSSAILTLEKNQRSSEKLQNRMKTPEKSDTVSRLEMPPPQSTPPLDHYLSPKPNTRTPSPTHQMITRSGRTPAKNSNTVAPCKPVFSPVGGTTVSEGADTVVKSPAKSLTRTKSGQGARATRHNLRSQSSENVLSKLYAESAENCEHVEKNLQSEPKEVQAETDSSSNTDSQQFDSSHFNSASTEDDSMDIVDAAVIKAQFSGGLKMNISFSRKPSKSGDDFLFSAVSPKPHVPPKGTPGRSYGFRQTPDRQQREAAARLGYGNESPRFSTPRGLARPSRQRGMDTPNPLTYQVEMEMQTSGLPKLKFKRTDSMNVGDLTSGAQSPLVGVKPSQLESPLALFSKHRDPGCVSPSVCTHVTPAKSTPGKGGSFQTYICHSYTPTRHQAGTMSPPVTASGILALTHSPLHNLRPAFDSLSYMPRVHRAGTFGKGPVIMTWLCDKATPNGYTLDQAIQTGVDNPGHPFIKTVGMVAGDEESYEQSVGVFAELLDPIIKERHNGYDPKTMKHPTDLDSSKLQLGHFDERYVLSSRVRTGRSIRGLSLPPACTRAERREVERVVVDALDGLKDDLAGKYYSLTLMTDQEQQQLIDVSIFLPPTMKKIDQIIEFSSLTPSTISCLTSPPVLCKRPGCQIVSSDFFLCNFSKYFAKDREVAHTFSSVKFCLWRKILAY | 214.1 |
| Gelsolin | A0A4U5UXM5 | MCEDERSLAEDVVSLRYLLRLTDLSLQSVGQRVSQSQGQNDRVESKQQSPHRLTLQDLQAPDDPPSQSGCVCQECGAAERRAAAGSLSPPFSNSRSASVQSGSEEMEPVSSRKKAGCVRQENACLTMQDEHLISDLDAMQYELASFKSQVGLRGPRVGVRHNVAVMSEQIRQLQAELEAQTEELKAVELRAECSQEEAAHSNIVMATLTEDLNTLREELDAKTALCKRQMMEEVRQAKSAAAGHQAQLEETERKAFHLERQLKERGAECRELASLRKELEDVRTLAQSQEQRMTQSHREAQQSQAELASLEAILALLHLREGAVEQLCSRPCMLPQVDYSRTTHLLKLKPGEGYQQLLRVLHSKDAERTKQNSLIERLQERLSRAQEEISTLQSSMAQRASHYQSLHTELMDKVSQSTDTEKELKRKGARVASLEKQLQEKTSAYGQAALKNTELESQLLEKTSTIQHYQSLMTKKQREYQQSLEKSKKAQSQHFTEQQHRIEMLQLSVEEAQSRVLEMEEELSSLQKERDEAQKAALLLQSSVEQLQQQKQIEVRHNEELLQSFKEQAAQSATKVCELQSSLSACREELNLYLRQMKEVEKNYEGELQKKSDTVSSLQEKLHSARLVCQSSSEQNLQLQLSLQQQQTMLTESTAHISELEESQSHLQTQVSSLEQQLEKARASLQDEVRNREQDAQEKDKQLQEMTQQGTKLSESVSHLTSEMTKCREELAHKESELQCLRRDVAAKTSQISRMDERLHHMKSQLDSKTEMLVDLEETLHLCEADKLNCVQRVEILEGQLQVVRRELADTLDQLQTLRDVLQRTQTVSDERQASVEKLTVQLSETQRELEERTHEVLDMDNALKERQGELQQRANLLGQLEVAIREHKQEMERKVESLQQSLEDRERELRDTQRELADRNLKSQELGQHLQVCQQKRQTLLKELEETQHHCEDLTRELDATKLQAKEKEARLCGMEEELALKEARWLQLEARLQSMVVSLEQELELEREQHSKELDSLQQSRGQLLKVSSTIRSSQEQLTVKLQQSQSQLEQARAQCDRTKTQLDQTKTELDCTRKQISHLQTQKDQAEMQLLQSKTQLEQSRILYDQTRDQNSHLHAQLEQLSNQLNQARVQATQLQASEKSSLLIKESQVTQHQFTHSPERSSARSPPSSPQNPQTAPQTVPFSTHTHLTRRFSPTHTRTCSSPPAHTHHHPISAPHLSYQTESYRIHDWLQSSSIDSSLDLPLSLKAELKEAMSKEPWESSSPSISLFPDTADHSWQGLNAIDATATSDLSFNPLTYMVDKQDGRNLNTEVTSLQERDDEQARELTRESVGQEEEEVNMSSLTGMLRFVNQTLAKQEDPSLWSITGLSENGHSLTLQKGGVASGFQHVVTNDMNVKRLLHIKGRRAIRATEVDMSWSSFNKGDCFIVDLGKNIYQWCGSECNRFEKLKAAEVAIDIRDNMRNGRGQLHIVEEGHETAEILEALGPKTEIAPSVADDDKADTSNRKKGALYMISDASGSMKVSAVAQSSPFKQAMLSPEECYILDNGPDKNIFVWKGPKANMAERKAAMSAGQQFIKDKGYAKRTQIQVLPAGGETTLFKQFFSDWRDKDETTGPSKAYTIGRIAKVPQVPFDASSLHSNKTMAAQHGMVDDGKGKVQIWRVENGDKVPVDPSSYGQFYGGDCYLILYSYRVGGREQHIIYTWQGLKCTQDELAASAFLTVQLDDSMHGAPVQVRVTQSQEPPHLMSLFQGKPMIIHTGGTSRKGGQSQTAGTRLFHIRQSSSHATRAVEVEASASNLNTNDVFVLKSSNTLFVWRGTGASDEEMEAAKHVVGFLGGSPSQVSEGKEPADFWSALGGKKEYQTSKSLQNVVKPPRLFGCSNKTGRLDVEEVPGDFTQSDLATDDVMILDTWDQIFIWIGNEANAVEKTGAPKIAKEYVDSDPSGRGGLPITTIKQGAEPPTFTGWFQAWDSKMWETDPLERIRVRF | 224.6 |
| Nebulin | A0A4U5U1Y5 | MGILFTKLWRLFNHQEHKVIIVGLDNAGKTTILYQFSMNEVVHTSPTIGSNVEEIVVNNTHFLMWDIGGQESLRSSWNTYYTNTEFVIVVVDSTDRERISVTKEELYRMLAHEDLRKAGLLIFANKQDVKGCMSVAEISQSLQLTSVKDHQWHIQACCALTGEGNRPIMTEIVEEYEEYEEYEEEFVEESGLPTRKVKKRAKVDTSKFMTPYLAHSQKMLEQFSHNKYRQAYDMSRGTPPAIITDTPEMIRIRKAQEQLSEVKYRMEGNKARTTSLYDGEAKEVTHVKRVSELISKVLYRQKWDETKDRYLLPPDAPELVLAVKNAANYSKKLYTESWDEEKTMFYPYSDSPELRRVAKAQEVLSDLKYKEDYNKNVKGQWCETPYFDVAVARVAMENLSNVQYKKEYEKNKAQSDYNTLPATENPLLRQLRYAGTILSDKVYKSNYEKSRGFSINYCDTPKFQMDSVLKQFTDARYKTKYDNEVKGHYIGSYEDVYMLHCQKVEEMKNEQLYKAEYEDIKTRCFFPQTITPEYEATKKLQQCSDKTYRKHPDTVKFTQVVDSPVLVQAAINAKQLSDLNYKAEYEKIKMKSSLPPDYPFFIQSRVNAFNLSDNCYKYDWEKSKAKKFEVKGDAISILAARAHTNIASDVKYKKEYEKNKGHMVGALSINDDPKILHSVHVAKIQSDREYKKDYEKVKTKYHTPLDMISVTLAKKSQGIASMAGYRSISTNFFYPPDAVLLDLAKKANVIQSDNEYKADYNAYTKGTPWIPFGSIEVEKNKKAAEILSEKKYRQHPDTIPFTSIDDHPVMMQAKVNQLQRSDLFYKRGLEEVHQKYSLPPDVPEFLQARCNAYNISDKCYKLAWQEHIAKGYDLKPNAISVVAAKAARHAASDVQYKKAYEKDRGHHVGFRSLQDDPLLVHYMQVAKIQSDKNYKKDYHKSKLKYHTPVDMMSMAHAKHASKVQTYAGYKQHHHNYCLLPGSMSLDLARNMSFNASDVNYKMEYENYVKGTGWVPIGSLDVQKAKAAAAALDEKKYRQHPDTLKFTSVSDSMNMELAKSNAKILDAKAYKASGEKFMHTYHLPPDVPELMQARYNAVNISQNYYTYQHRKDLLKGHHVKEDAIPIVAAKSGRDIASNYKYKLAYEKAKGHHVGFRSLQDDPLLVHYMQVAKMQSDKNYKKDYHQAKLKYHTPVDMLSVVHAKQASAAQTMAGYKQIPHSYFLLPDNMHLNLYRNMMEIQSDNVYKSDYTNYCRGTGWVPIGSVDVEKAKTAKAALAEIGYRQHPSTLKFTSKTDSMNMVLAMTNTKQMNNTAYKASGEKFMHTYNLPADSPEFLQAKFNAQTMSESHYKHKWLEDIAKGYDMKPDAISVLHAKHGRHIASNVQYKKEFEKARGHHVGFRSLQDDPLLVHYMQVAKMQSDKNYKKDYHQAKLKYHTPVDMLSVVHAKQASAAQTMAGYKQIPHSYFLLPDNLHLQRCRNMNIQSSDSDYKSEWNNYIRGIGWVPIGSLAVETAKVGGQIQSDNKYRTHPSNFKFSKLMDSMDLTLATVNNQIMNKQAYTAAWNKDKLTVHVMPDSPEIVLAKANALNMSNKLYKAGVVEMAKKGHNLKADAIPIQAAKSGTTIASNYKYKLAYEKARGHHVGFRSLQDDPLLVHYMQVAKMQSDKNYKKDYHQAKLKYHTPVDMLSVVHAKQASAAQTMAGYKQIPHSYFLLPDNLHLQRCRNMNIQSSDSDYKSEWNNYIRGIGWVPIGSLAVETAKVGGQIQSDNKYRTHPSNFKFSKLMDSMDLTLATANNQIMNKQAYTAAWNKDKLTVHVMPDSPEIVLAKANALNMSNKLYKAGVVEMAKKGHNLKADAIAIQAAKSGTTIASNYKYKLAYEKARGHHVGFRSLQDDPLLVHYMEVAKLQSDKNYKKDYHKAKLKYHSPVDMLSVVHAKQASAAQTMAGYRQIIHQYNVLPDAMNLQLARNMQFIASDNQYKSEYDSFMKGIGWVPIGSLDVERSKTAGKILSDSGYRQHPSNLKFTKDMQSMDLMLAAANNQIMDKQSYNKAWEKDKTSIHIMPDAMDIVLARGNRKNFSEKLYKLDNELSKKKGHNLRADAIAVKAAKASTAIASDYKYKTGYRKQVGHHIGARSVQDDPLLMLALNSARIASDALYKKDFNKSKTKFHLPVDMLAFELAKKNQIQVNHANYITRLHNWTCLPDSSDVVQARHAYDLQSDAVYKEDLKMMQGIGWVPIGSLDVEKAKKACEILSEKKYRQHPSNFKFKMTTDHMPLVLAKANAGIVNKKAYTEAWDKDKTTVHVMPDAMDVLLAKANNVNYSVKKYKQANEDAKKKGYNLRGDAVSILAARASRDIASDYKYKTGYRKQVGHHIGARSVQDDPLLMLALNSARIASDALYKKDFNKSKTKFHLPVDMLAFELAKKNQIQVNHANYITRLHNWTCLPDSSDVVQARHAYDLQSDAVYKADLKWLQGLGWVPIGSVDVEKAKMAAQALSERGYRQHPSTFKFKMTTEDMPIVLAKANAKVMNKKAYSEAWDIAKRTIHIMPDSMDVLLAKANNVNYSLKKYKQANEDAKKKGCDLRGDAVSILAARASRDIASDYKYKTGYRKQVGHHIGARSVQDDPLLMLALNSARIASDALYKKDFNKSKTKFNLPVDMLAFELAKKNQIQVNHANYITRLHNWTCLPDSNDVVQARKAYDLQSDAVYKADLKWLQGLGWVPIGSVDVEKAKMAAQALSERGYRQHPSTFKFKMTTEDMPIVLAKANAKVMNKKAYSEAWDIAKRTIHIMPDSMDVLLAKANNVNYSLKKYKQANEDAKKKGYDLRGDAVSILAARASRDIASDYKYKTGYRKQVGHHIGARSVQDDPLLMLALNSARIASDALYKKDFNKSKTKFNLPVDMLAFELAKKNQIQVNHANYITRLHNWTCLPDSNDVVQARKAYDLQSDAVYKADLKWLQGLGWVPIGSVDVEKAKMAAQALSERGYRQHPSTFKFKMTTEDMPIVLAKANAQVMNKRLYTEAWEKDKVNLHIQPNTPEIVLSQQNAINMSKKLYRQGFEADIRKGYFLPPDSVSVKAAKASREIVSDYKYKTGYRKQVGHHIGARCVQDDPLMMLAINSARIASDALYKKDFNKSKTKFNLPVDMLNLELAKKCQKQVNDFNYRTHLHQWTCLPDSTDVVQARKAYNLQSDAVYKADMDEVIGIGWVPIGSIDVMKVKNASKILSERLYRQKPETLKFKTDMTSMPMVLAKTNADIINKKNYIAAWEADKLKTHVTPDLPEILLSKVNAYNISRKNYREDVEKLFRKGYDLKPDAVAVVAAKRGREIISDYKYKTGYRKQVGHHIGARCVQDDPLMMLALNSAKIASDALYKKDFNKSKTKFNLPVDMLNLELAKKCQKQVNDFNYRTRLHNWTCLPDSTDVVQARKAYDLQSDAVYKADMTWIKGTGWVPIGSVDVEKAKKAAAILSERKYRQHPSMFKFTAKTHDMPYALAQANAQIMDKKAYLAAWENDKTNLHIMPDTPEILLAKQNKLNTSLKYYREGFVNTINKGYFLPKDAISVLAAKASRNIISDYKYKAGFRNQCGHHIGALSVKDDPLIMLAAHVAKISSDNIYKKEFNKTKTKYHLPVDMLTIELAKKCQKQAVYKADMEWLRGCGWSPQDCVDVLKVKHAQTILNERLYRQHPSTVKFTSVADLPAIVLSKQNADNISDRKYKEVWDKDKLNFHLPPATPTFELSKANSINISNKLYTEAWDSQKAKGYQIKEDAISVLKAKASRDIISDYKYKTGYRKQVGHHIGARCVQDDPLIMLAINSARIASDALYKKDFNKSKTKFNLPVDMLNLELAKKCQIQVNDFNYRTHLHQWTCLPDSTDVVQARKAYDLQSDAVYKADMEWLRGCGWVPHECVDVMKVKHAQKILAERGYRVKLDEQKYTVPIDRVDMVGAKNAADVLNEAKYREAWHEEKTKYSLVDTPILATAREVAKNIHPKLYTKAWDTVKATGYFMPGDAVPIKQCIQTSKVQSQHHYLEAYRKQVGHHIGARCVQDDPLMMLALNSARIASDALYKKDFNKAKTKFNLPVDMLAFELAKKCQKQVNDVLYRTRLHQWISLPDQNDVIQARKVYDLQSDNVYRADLEWIRGCGWQAADSVHHVKVRKAQEILNERLYKKNAKECFGQFTLIVDRPEIVLAKVNAANLSDLKYKETFNAEKGHYIGSEDTPQLAHSREVSKNISEKLYKSDWDATKATSYQLNHEYIPLLSGKKGREIASDVKYKDSHEKAKGHYMAGTLVDFPEVVRCGDQEKKKGLRLYQKDYHQSKTKIHLPPDIITNKVAKKCQDMLSDVLYRTYLHQWTCHPEQEDAIRARKTNEILSDVFYRDDLNWMKGIGCYVWDTPEIVRAKKSYELQSDLKYRDEAKKEFNNYSIVTDTPVYVTAVLGHTWASDLNYKEAYHKEKHMYTTVLDTHDYARCHNFKEYFSNKNYTEAWDKIKAKSYQIPHDSHALQHAKNQKVILSNVKYKEDYEKFKSLYSLPKSLEDDPATARCVKAGKLVLDRLYRENYEKTKAKNHIPADMLEILSARNTQATVSGIHYRKYLHQWICLPDMQVYTQARKVNEQLSDIFYKDDLNWLKGIGCYAWDTPEILRVKHAGNLQSEAKYRAKGIEAFKDYSVVTDTPVYTTCIQNSQNLSDLHYRYDYNANIKGTNTAPAVTIETERARLANYIQSDNWYKEANKNLMPTGYSLPHDTPLIKQAKMNSVITSSVKYKEAYEMTKAKAYSLHPEGVNFVNSRHSNKIINDRLYRQDYHKQKDKIHTTYDTPDIKQVKMNQKHLSDLCYKEKYYNNRGQLISMPITPELMHCRHVNEITSELKYKEDLVWLRGLGCFLYDTPEMVTVRNITKQRVTYPVEAKKNLAKFSVVLDTPEYKRVTELKTHMSHLIYKAQSKQEMSKVSTTVDAVDIQRAKWAQQLTNKASSHYKYIDLAAKERPHYTPESQTPDLTHAKKMKVVYSDNKYKEQYEKMKHRYTAIGDTPLLIRAKKSYIQSSDLRYKETFELAKGHYRTVKDALDITYHRRVTDDISEVKYREKYINSLGTWKSIPDRPEFFFSKIANDNVSSIKYKEDLDWLKGIGCYVWDTPELVLAETNKALYSERLYKVSSEKNRGNFKYTSDTPFFEAAKNASNLINDRAYRANYEKTKNKFTITTDDPRYQLARENNKMSQARYKSKAKDLLKSGCNELRRPDILTALYQSVLGSKWKYRQQYERAKDKFTSILDTPEYETHKRKKKISDIIYKMEYNKTKAKAYTLPYDTPHQQHMKKVKEITSNLKYREVYEKGKAQINMDPEAHEIRAAKEAYRNITNLDYKKKYEATKAKYIWTSDRPDLLNAAKNSMQQSDVEYKYDKESMKGCVIPVVDDKLTLLAMKNNEMASIVKYKEKYEKEKGHYLPVQDTPQILHAKAVRTLASETRYKEASKKDMQSGSFTTLPVTRDTAHSKEVNKLVSRNVYKEKFEKEKGKSVYNHMMVPPDVQHAMAVAKSQSSISYKKDAKANLHYTSVADRPDIKKATQAAKLISGIGYRDKAREEASRGGSLVNRPDITLATEVSKLTSEVEAKPSLHGAASYDTPQMRHIKKMSAVTSDLKYKEKFDKEVKGKRPQYDLKESKIYKTLKDANALASEVKYKGDLKKIHKPVTDMAESLSMQHSLSTSRLSSQYCYKKKFEESKGHYHMIPDTPEQLHHKEASDLQSNVKYKEKYEKEKGKAMLDFETPTYVTAKEAQHMQSQKDYKKDYEDNMRGKNLSGLEVTPAMLHVRHATKIASEKEYRKDLEEGVKGKGLTALEETPELLRARNATQILCEREYKKALEHEIKGKGMLALATDTPDFMRARNATDILSQTKYKQTAEMDRASYTTVIDTPDIIHAQQMRNIVSQKKYKEEAEKTMSHYVPVLDTPEMQRVRENQKNFSTIQYKDSVGQGTAIPDLPEVKRVRETQKNISSLQYKAGVGQGTSVSETPEMERVKRNQLNISTIQYKDSVGQGTAIPDLPEVKRVRETQKNISSLQYKAGVGQGTSVSETPEMERVKRNQLNISTVLYKDSSAKGTPVVYTPEMERVKRNQENISSVLYSDSFRKQVQGKAAFVLDTPEMRRVRETQRIISGVRYHEDFEKSKGSFTPTTSDLVTERVKRNTQDFSDISYRGIQRRVVEMERRRAIEHDQETTTDLRVWRTNPGSVFDYDPAEDNIQSRSLHMMSVQAQRRSKEHSRSTSALSGLADEKSEVSQDTYHHIALNGSSFGGYQHAKTVELQQRSSSVATQQTTVSSIPSHPSTTGKTVRAMYDYAAADNDEVSFKDGDVIVNVQAIDEGWMYGTVQRTGKTGMLPANYVEAV | 730.6 |
